# Supplementary material
Source: PubMed Central journal article supplement (PMC9529240)
Supplement: NIHMS1824856-supplement-Supplemental_Digital_Content.pdf [file NIHMS1824856-supplement-Supplemental_Digital_Content.pdf]

**Table 1:** Senotherapeutics reported to have positive effects on skin and skin-derived cell types.

| <b>Senotherapeutic</b>        | <b>Mechanism</b>                                                                        | <b>model</b>                                                                                                            | <b>Outcomes</b>                                                                                                               | <b>Reference</b>                                |
|-------------------------------|-----------------------------------------------------------------------------------------|-------------------------------------------------------------------------------------------------------------------------|-------------------------------------------------------------------------------------------------------------------------------|-------------------------------------------------|
| <b>D+Q</b>                    | Pan receptor tyrosine kinase inhibitor                                                  | radiation induce senescent human oral keratinocytes and skin fibroblasts and mouse oral ulcer and rat skin ulcer models | downregulate p16 <sup>Ink4a</sup> and SASP, upregulate proliferation marker Ki67 and mitigates radiation induced ulcers       | doi:10.3389/fonc.2019.01576                     |
|                               | BCL-2, PI3K/AKT pathway, insulin/IGF-1, HIF-1 $\alpha$ and other SCAPs kinase inhibitor | patients with diabetic kidney disease                                                                                   | reduction in p16 <sup>INK4A+</sup> and p21 <sup>CIP1+</sup> skin epidermal cells as well as circulating SASP factors          | doi:https://doi.org/10.1016/j.ebiom.2019.08.069 |
| <b>ABT-737</b>                | inhibitor of BCL-W, BCL-XL, and BCL-2                                                   | double-transgenic K5-rtTA/tet-p14 mice                                                                                  | decrease in SAbGal+ cells, Increased levels of apoptosis, and increase in proliferating hair-follicle stem cells in the bulge | doi:10.1038/ncomms11190                         |
|                               |                                                                                         | melanoderms exposed to UVA+B                                                                                            | senescent cell clearance, reduced mitochondrial ROS and epidermal atrophy rescue                                              | doi:10.15252/embj.2019101982                    |
| <b>FOXO4-D-retoro-inverso</b> | disrupts p53-FOXO4                                                                      | XpdTTD/TTD mouse model of accelerated                                                                                   | alleviated aging skin phenotypes,                                                                                             | doi:10.18632/aging.102682                       |

|                            |                                              |                                                                  |                                                                                                                                        |                               |
|----------------------------|----------------------------------------------|------------------------------------------------------------------|----------------------------------------------------------------------------------------------------------------------------------------|-------------------------------|
| <b>peptide (FOXO4-DRI)</b> |                                              | aging and naturally aged mice                                    | hair loss and discoloration                                                                                                            |                               |
| <b>Fisetin</b>             | Blocks PI3K/AKT/mTOR pathway and antioxidant | UVB irradiated hairless mice                                     | reduced collagen degradation, wrinkling, trans epidermal water loss and inflammation                                                   | doi:10.3390/ijms18102118      |
| <b>Tamatinib</b>           | Syk inhibitor                                | replicatively-induced senescent human diploid dermal fibroblasts | Senolysis                                                                                                                              | doi:10.18632/aging.103135     |
| <b>Nav-Gal</b>             | BCL-2 family inhibitor                       | palbociclib induced senescent SK-Mel-103 melanoma cell           | Senolysis and additive antitumor effects in combination with cisplatin                                                                 | doi:10.1111/acellular.13142   |
| <b>Rapamycin</b>           | mTOR inhibitor                               | UVA induced senescent human dermal fibroblasts                   | reduction in senescence markers and SASP as well as oxidative and genotoxic stress. Increased autophagy and type I collagen expression | doi:10.3389/fcell.2021.633331 |
|                            |                                              | doxorubicin induced senescent human dermal fibroblasts           | reduced senescence phenotypes, SASP, and ROS while improving migration ability, cell proliferation                                     | doi:10.1038/srep43299         |

|           |                                                         |                                                                                     |                                                                                                                                                                            |                                    |
|-----------|---------------------------------------------------------|-------------------------------------------------------------------------------------|----------------------------------------------------------------------------------------------------------------------------------------------------------------------------|------------------------------------|
|           |                                                         | humans 40+ years of age with evidence of photoaging                                 | improved clinical appearance of the skin, increased levels of collagen VII, and reduced expression of p16Ink4a and other histological markers of aging and senescence      | doi:10.1007/s11357-019-00113-y     |
| Metformin | Many targets                                            | humans with skin diseases                                                           | reduces symptoms associated with hidradenitis suppurativa, acanthosis nigricans, hormonal acne, psoriasis, cutaneous malignancies, hirsutism and hyperpigmentary disorders | doi:10.4103/0253-7613.174388       |
|           |                                                         | replicatively induced senescent human dermal fibroblasts and mesenchymal stem cells | reduced SA- $\beta$ -gal activity, reduced expression of SASP and markers of senescence. Increased the percentage of Ki67+ cells                                           | doi:10.1111/acellular.12765 (2018) |
| apigenin  | inhibitor of NF- $\kappa$ B p65 activity <i>via</i> the | bleomycin-induced senescent BJ fibroblasts                                          | Potent inhibition of SASP                                                                                                                                                  | doi:10.1016/j.bcp.2015.06.013      |

|                     |                                                                                                       |                                                 |                                                                       |                                   |
|---------------------|-------------------------------------------------------------------------------------------------------|-------------------------------------------------|-----------------------------------------------------------------------|-----------------------------------|
|                     | IRAK1/I $\kappa$ B $\alpha$ signaling pathway                                                         |                                                 |                                                                       |                                   |
| kaempferol          | inhibitor of NF- $\kappa$ B p65 activity <i>via</i> the IRAK1/I $\kappa$ B $\alpha$ signaling pathway | bleomycin-induced senescent BJ fibroblasts      | Potent inhibition of SASP                                             | doi:10.1016/j.bc<br>p.2015.06.013 |
| oleuropein aglycone | undetermined                                                                                          | Pre-senescent neonatal human dermal fibroblasts | reduced SA- $\beta$ -gal+ cells, p16INK4a protein expression and SASP | doi:10.3390/ijm<br>s18112275      |
| hydroxytyrosol      | undetermined                                                                                          | Pre-senescent neonatal human dermal fibroblasts | reduced SA- $\beta$ -gal+ cells, p16INK4a protein expression and SASP | doi:10.3390/ijm<br>s18112275      |
